# Supplementary material
Source: Springer Nature journal article supplement (https://www.springermedizin.de/resource/supplementary/12872_2014_741_MOESM9_ESM.pdf/9430780)

**A**Normalized NHE1  
Transcript Abundance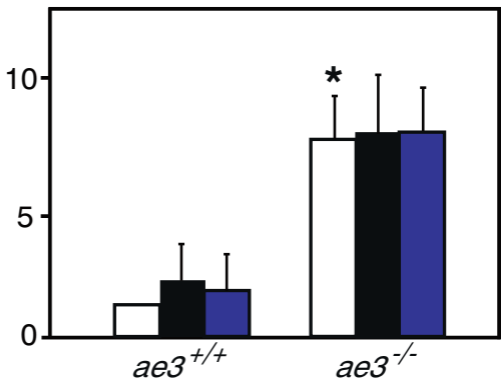**B**Normalized CAII  
Transcript Abundance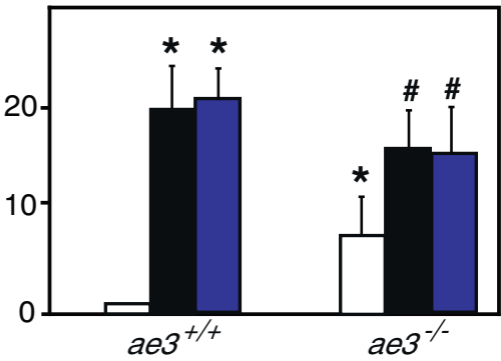

Supplement: MOESM9 [file 9430780]
